# Supplementary material for: Radiofrequency Treatment Attenuates Age-Related Changes in Dermal–Epidermal Junctions of Animal Skin
Source: MDPI journal article supplement (doi:10.3390/ijms25105178), 2024-05-09
Supplement: s1 [file s1]

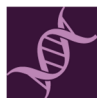

Article

# Radiofrequency Treatment Attenuates Age-Related Changes in Dermal–Epidermal Junctions of Animal Skin

Kyung-A Byun <sup>1,2,3,†</sup>, Hyoung Moon Kim <sup>4,†</sup>, Seyeon Oh <sup>3</sup>, Sosorburam Batsukh <sup>1,3</sup>, Kuk Hui Son <sup>5,\*</sup>  
and Kyunghee Byun <sup>1,3,6,\*</sup>

- <sup>1</sup> Department of Anatomy & Cell Biology, College of Medicine, Gachon University, Incheon 21936, Republic of Korea; kabyun95@gachon.ac.kr (K.-A.B.); sosorburam72@gachon.ac.kr (S.B.)
- <sup>2</sup> LIBON Inc., Incheon 22006, Republic of Korea
- <sup>3</sup> Functional Cellular Networks Laboratory, Lee Gil Ya Cancer and Diabetes Institute, Gachon University, Incheon 21999, Republic of Korea; seyeon8965@gmail.com
- <sup>4</sup> Maylin Anti-Aging Center Ilsan, Goyang 10391, Republic of Korea; drmac12@me.com
- <sup>5</sup> Department of Thoracic and Cardiovascular Surgery, Gachon University Gil Medical Center, Gachon University, Incheon 21565, Republic of Korea
- <sup>6</sup> Department of Health Sciences and Technology, Gachon Advanced Institute for Health & Sciences and Technology (GAIHST), Gachon University, Incheon 21999, Republic of Korea
- \* Correspondence: dr632@gachon.ac.kr (K.H.S.); khbyun1@gachon.ac.kr (K.B.); Tel.: +82-32-460-3666 (K.H.S.); +82-32-899-6511 (K.B.)
- † These authors contributed equally to this work.

**Citation:** Byun, K.-A.; Kim, H.M.; Oh, S.; Batsukh, S.; Son, K.H.; Byun, K. Radiofrequency Treatment Attenuates Age-Related Changes in Dermal–Epidermal Junctions of Animal Skin. *Int. J. Mol. Sci.* **2024**, *25*, 5178.  
<https://doi.org/10.3390/ijms25105178>

Academic Editor: Terrence Piva

Received: 16 April 2024

Revised: 3 May 2024

Accepted: 7 May 2024

Published: 9 May 2024

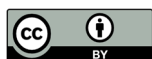

**Copyright:** © 2024 by the authors. Submitted for possible open access publication under the terms and conditions of the Creative Commons Attribution (CC BY) license (<https://creativecommons.org/licenses/by/4.0/>).

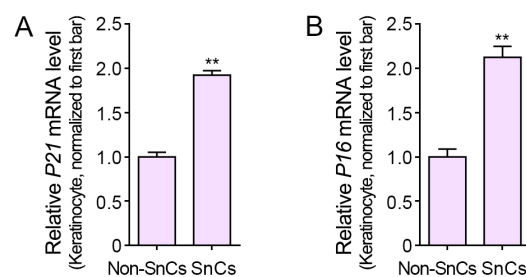

**Figure S1.** Expression of *P21* and *P16* of senescence marker in non-senescent and senescent keratinocytes. **(A,B)** PCR analysis of *P21* and *P16* in keratinocytes. Data are presented as mean  $\pm$  SD of three independent experiments. \*\*,  $p < 0.01$  vs first bar. CON, control; PCR, polymerase chain reaction; SnCs, senescent; SD, standard deviation.

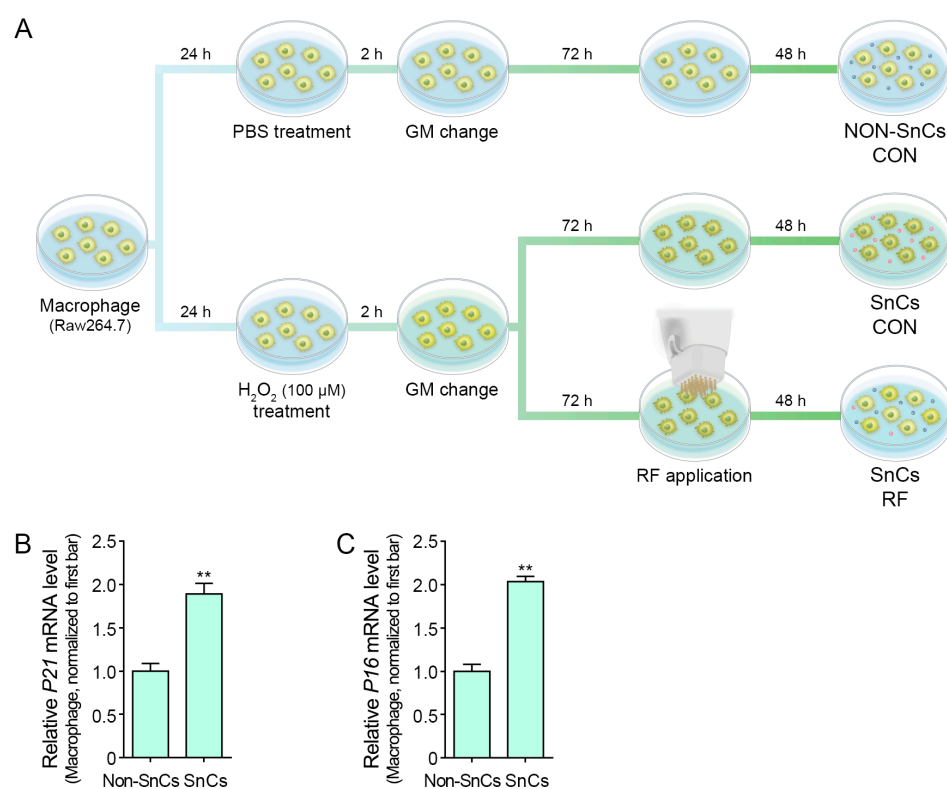

**Figure S2.** Schematic illustrating H<sub>2</sub>O<sub>2</sub>-induced senescence in macrophages for evaluation of RF treatment and expression of *P21* and *P16*. **(A)** Schematic representation of RF treatments administered to senescent macrophages. **(B,C)** PCR analysis of *P21* and *P16* in macrophages. Data are presented as mean  $\pm$  SD of three independent experiments. \*\*,  $p < 0.01$  vs first bar. CON, control; GM, growth medium; PBS, phosphate-buffered saline; PCR, polymerase chain reaction; RF, radiofrequency; SnCs, senescent; SD, standard deviation.

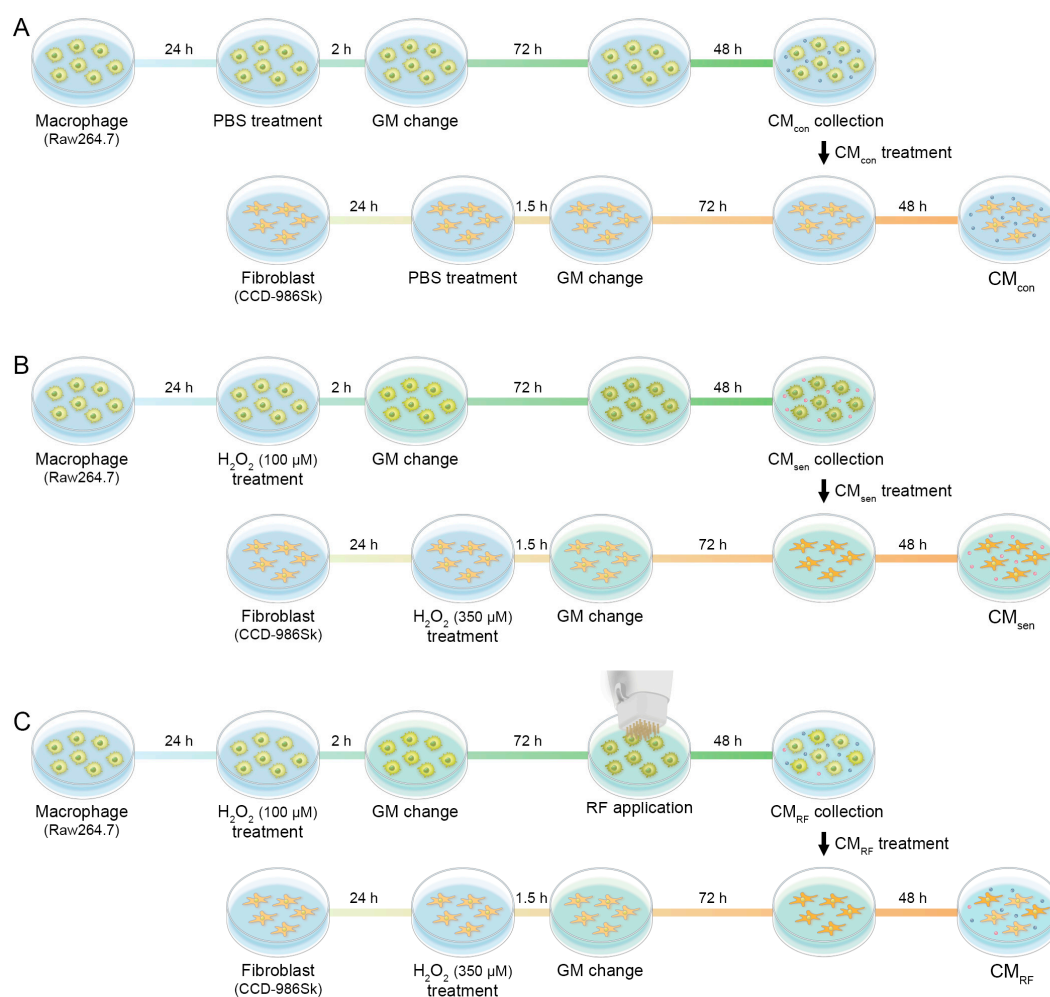

**Figure S3.** Schematic illustrating H<sub>2</sub>O<sub>2</sub>-induced senescence in fibroblasts for evaluation of RF treatment. **(A)** Schematic representation of non-senescent fibroblasts influenced by non-senescent macrophages. **(B)** Schematic representation of senescent fibroblasts influenced by senescent macrophages. **(C)** Schematic representation of senescent fibroblasts influenced by RF-treated senescent macrophages. CM<sub>con</sub>, conditioned media from non-senescent macrophages; CM<sub>RF</sub>, conditioned media from RF-treated senescent macrophages; CM<sub>sen</sub>, conditioned media from senescent macrophages; GM, growth medium; PBS, phosphate-buffered saline; RF, radiofrequency.

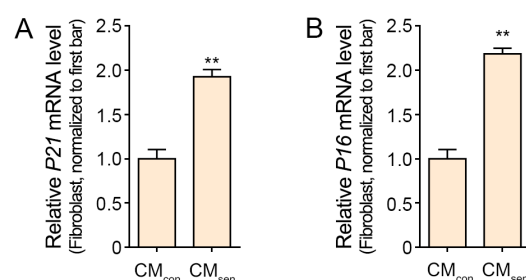

**Figure S4.** Expression of *P21* and *P16* of senescence marker in non-senescent and senescent fibroblasts. **(A,B)** PCR analysis of *P21* and *P16* in fibroblasts. Data are presented as mean  $\pm$  SD of three independent experiments. \*\*,  $p < 0.01$  vs first bar. CM<sub>con</sub>, conditioned media from non-senescent macrophages; CM<sub>sen</sub>, conditioned media from senescent macrophages; PCR, polymerase chain reaction; SnCs, senescent; SD, standard deviation.

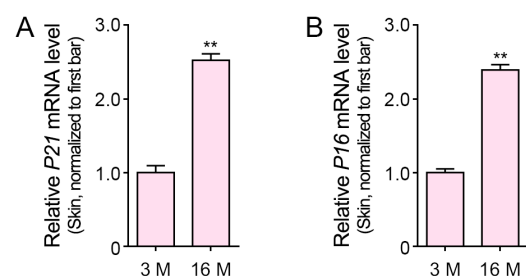

**Figure S5.** Expression of *P21* and *P16* of senescence marker in young and aged mice skin. **(A,B)** PCR analysis of *P21* and *P16* in 3-month-old mice and 16-month-old mice skins. Data are presented as mean  $\pm$  SD of three independent experiments. \*\*,  $p < 0.01$  vs first bar. 3 M, 3-month-old mice; 16 M, 16-month-old mice; PCR, polymerase chain reaction; SD, standard deviation.

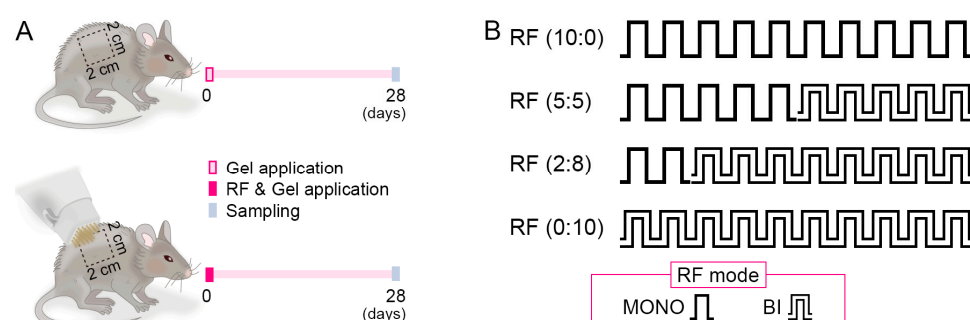

**Figure S6.** Schematic illustrating the experimental procedure of RF treatment in aged mice. **(A)** Schematic representation of RF treatment of 16-month-old mice. **(B)** Schematic representation of RF ratio. 10:0, 10 monopolar pulses only; 5:5, 5 monopolar pulses followed by 5 bipolar pulses; 2:8, 2 monopolar pulses followed by 8 bipolar pulses; 0:10, 10 bipolar pulses only; BI, bipolar; MONO, monopolar; RF, radiofrequency.

**Table S1.** List of antibodies for Western blot (WB), Enzyme-linked immunosorbent assay (ELISA), and Immunohistochemistry (IHC).

| Antibody      | Company        | Catalog No. | Dilution rate |         |       |
|---------------|----------------|-------------|---------------|---------|-------|
|               |                |             | WB            | ELISA   | IHC   |
| HSP47         | Abcam          | Ab77609     | 1:1,000       |         |       |
| HSP90         | Gene Tex       | GTX109753   | 1:5,000       |         |       |
| TGF- $\beta$  | Abcam          | Ab64715     |               | 1:5,000 |       |
| Collagen XVII | Affinity       | DF2913      | 1:5,000       |         |       |
| Collagen IV   | Invitrogen     | PA1-28534   |               | 1:5,000 |       |
| Piezo1        | Protein tech   | 15939-1-AP  | 1:500         |         |       |
| CD206         | Santa cruz     | Sc-58986    | 1:1,000       |         |       |
| IL-10         | Fine Test      | FNab04211   |               | 1:5,000 |       |
| pSMAD2/3      | Cell signaling | 8828        | 1:1,000       |         |       |
| SMAD2/3       | Cell signaling | 8685        | 1:1,000       |         |       |
| Nidogen       | Santa cruz     | sc-47773    |               | 1:5,000 | 1:100 |

**Table S2.** List of primers for quantitative reverse–transcription polymerase chain reaction.

| Gene (Organism)     | Primer sequences |                                     |
|---------------------|------------------|-------------------------------------|
| <i>ACTB (human)</i> | Forward          | 5'-CTC GCC TTT GCC GAT CC-3'        |
|                     | Reverse          | 5'-TCT CCA TGT CGT CCC AGT TG-3'    |
| <i>P21 (human)</i>  | Forward          | 5'-GGA GAC TCT CAG GGT CGA AAA-3'   |
|                     | Reverse          | 5'-GCT TCC TCT TGG AGA AGA TCA G-3' |
| <i>P16 (human)</i>  | Forward          | 5'-CAC TTT CCT GGG CAA CAA ATA-3'   |
|                     | Reverse          | 5'-CTT GCG GTC ATC ATC GTA GTT-3'   |
| <i>Actb (mouse)</i> | Forward          | 5'-AAA GCC TAT TTC TGC CAG GAC-3'   |
|                     | Reverse          | 5'-TCA TAG GTC ACG TAG CCC ACT-3'   |
| <i>P21 (mouse)</i>  | Forward          | 5'-ACC AGA GGC AGT AAC CAT GC-3'    |
|                     | Reverse          | 5'-TGC TTC TAC AAA CCC ACA AAT G-3' |
| <i>P16 (mouse)</i>  | Forward          | 5'-GGT TCT TGG TCA CTG TGA GGA T-3' |
|                     | Reverse          | 5'-GCA CGA ACT TCA CCA AGA AAA-3'   |
